# Supplementary material for: Extent, Causes, and Consequences of Small RNA Expression Variation in Human Adipose Tissue
Source: PubMed Central journal article supplement (PMC3349731; doi:10.1371/journal.pgen.1002704), 2012-05-10

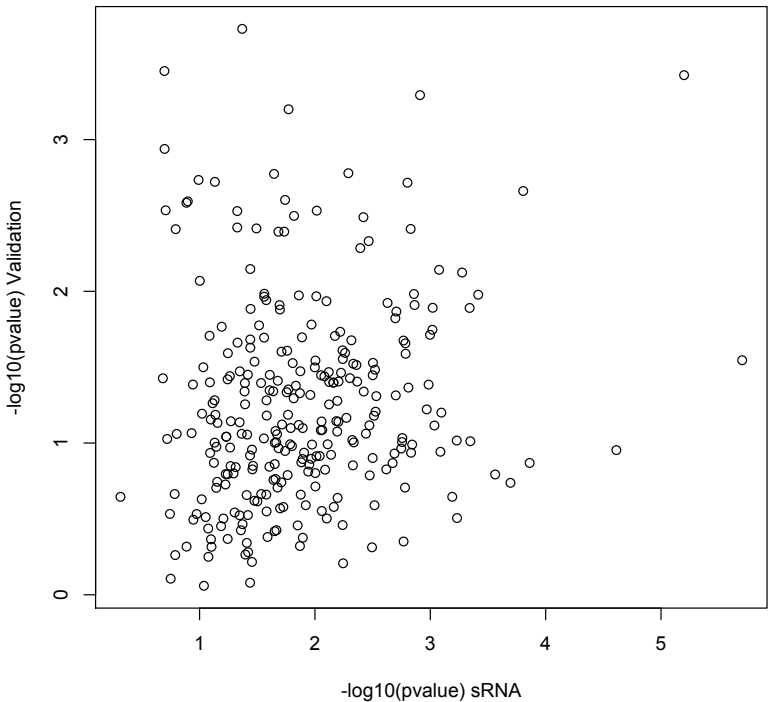

Supplement: pgen.1002704.s003.pdf [file pgen.1002704.s003.pdf]
