# Supplementary material for: Extent, Causes, and Consequences of Small RNA Expression Variation in Human Adipose Tissue
Source: PubMed Central journal article supplement (PMC3349731; doi:10.1371/journal.pgen.1002704), 2012-05-10

**miR-146b-3p**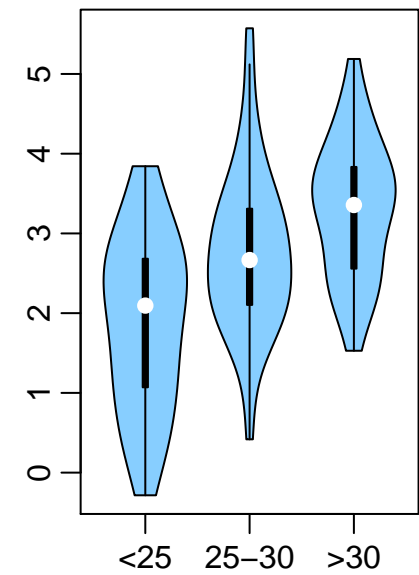**miR-146b-5p**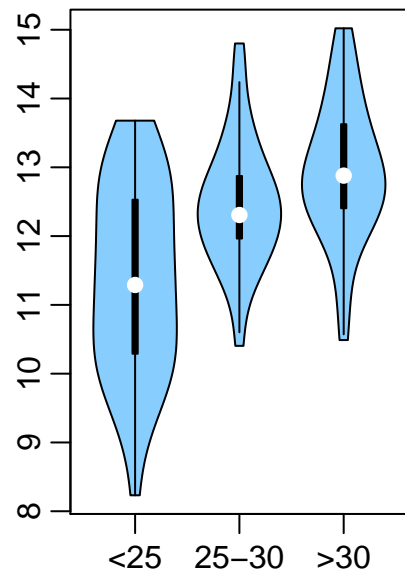**miR-215**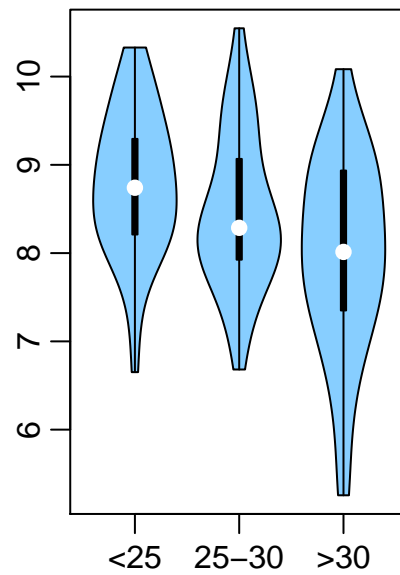**miR-21-5p**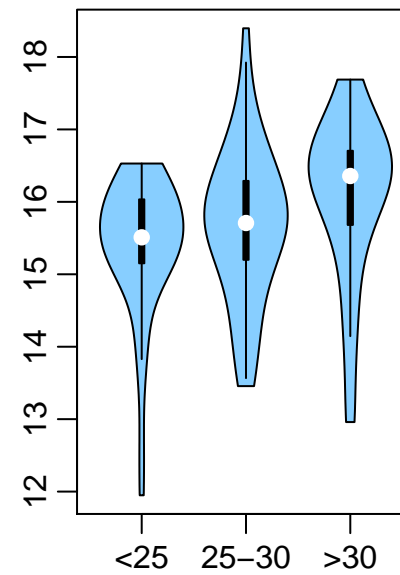**miR-1179**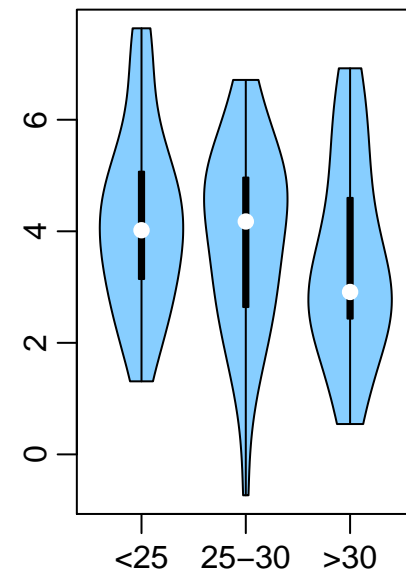**miR-146a-5p**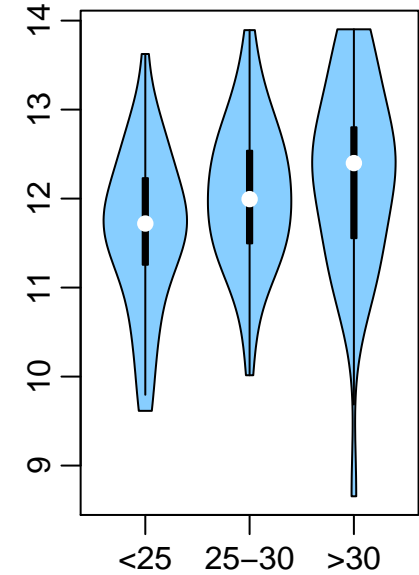**miR-340-3p**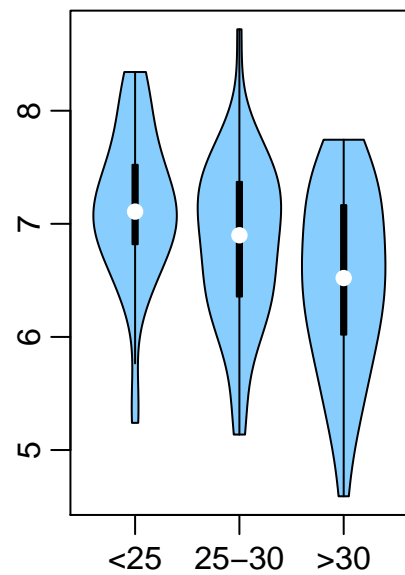**miR-193a-5p**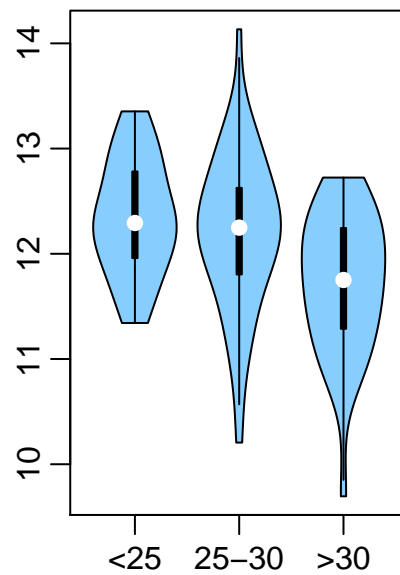**miR-181a-2-3p**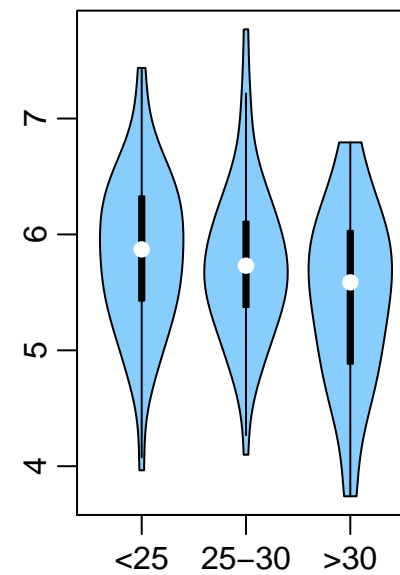**miR-4421**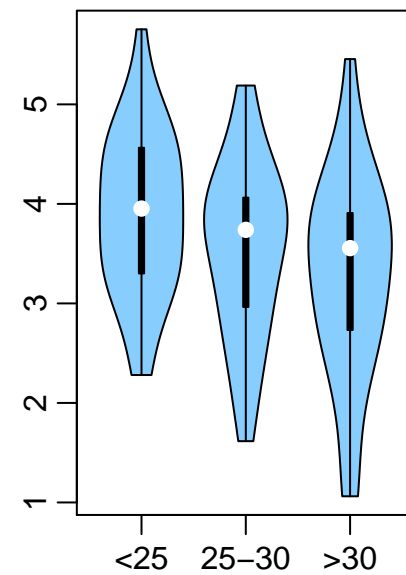**miR-598**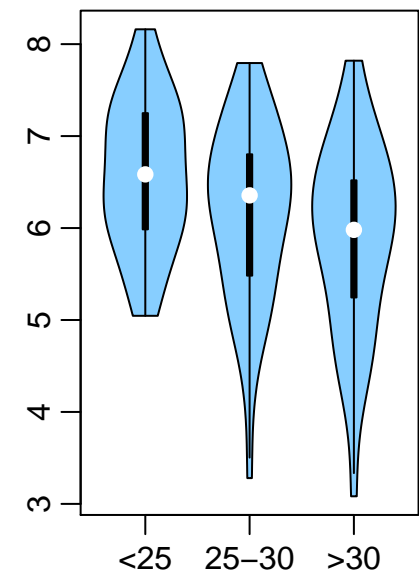**miR-218-2-3p**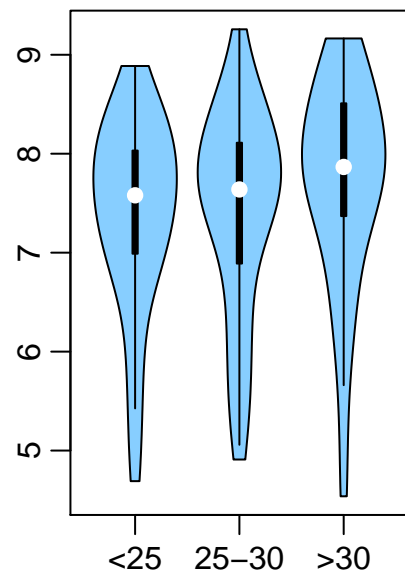**miR-218-5p**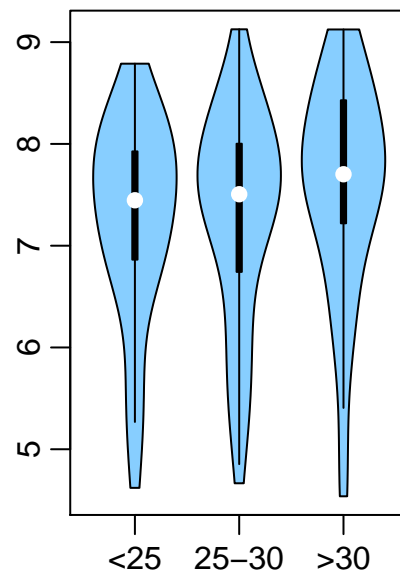**miR-29b-2-5p**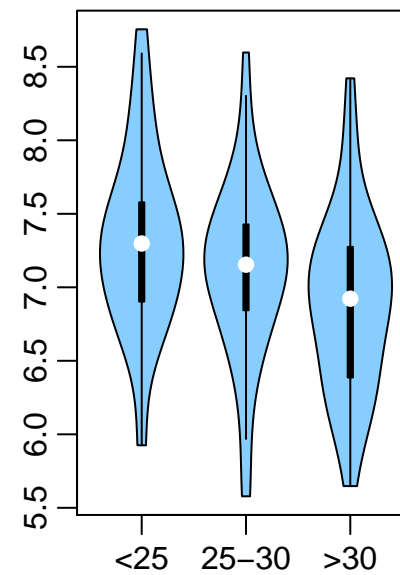

Supplement: pgen.1002704.s004.pdf [file pgen.1002704.s004.pdf]
