# Supplementary material for: Extent, Causes, and Consequences of Small RNA Expression Variation in Human Adipose Tissue
Source: PLoS Genet. 2012 May 10;8(5):e1002704. doi: 10.1371/journal.pgen.1002704 (PMC3349731; doi:10.1371/journal.pgen.1002704)
Supplement: Table S8 — miRNA eQTL replication p-values. Each row corresponds to one miRNA eQTL determined in our study, for which we give miRNA accession (column 1), name (2), eQTL SNP ID (3), and eQTL p-value (6). For miRNAs also assayed by Rantalainen et al. [22], we give the replication SNP (4), replication p-value (7), and correlation between the original and replication SNPs (5). (XLS) [file pgen.1002704.s017.xls]

## Sheet: table_S8.tab
miRBase ID	RNA ID	SNP	SNP Replication	r2 between SNPs	P-value	P-value Replication
MIMAT0000227	hsa-miR-197-3p	rs6658641	rs7537507	0.642	0.000157	0.00218
MIMAT0000454	hsa-miR-184	rs8033963	rs7183358	0.011	1.98e-06	0.0285
MIMAT0005951	hsa-miR-1307-3p	rs2986039	rs11191686	0.175	6.31e-06	0.000376
MIMAT0018926	hsa-miR-378d	rs13146468	-	-	7.84e-06	-
MIMAT0004615	hsa-miR-195-3p	rs2440129	rs1126667	0.611	2.44e-05	0.111
MIMAT0003328	hsa-miR-653	rs16868443	rs2074120	0.502	0.00014	0.135
MIMAT0004585	hsa-let-7i-3p	rs11174580	-	-	0.0002	-
MIMAT0017950	hsa-miR-2355-3p	rs10170608	-	-	0.00022	-
